# Supplementary material for: Radiation-induced lung damage promotes breast cancer lung-metastasis through CXCR4 signaling
Source: PubMed Central journal article supplement (PMC4694940; doi:10.18632/oncotarget.5666), 2015-09-15
Supplement: oncotarget-06-26615-s001.pdf [file oncotarget-06-26615-s001.pdf]

# Radiation-induced lung damage promotes breast cancer lung-metastasis through CXCR4 signaling

## Supplementary Material

Supplementary Fig. S1

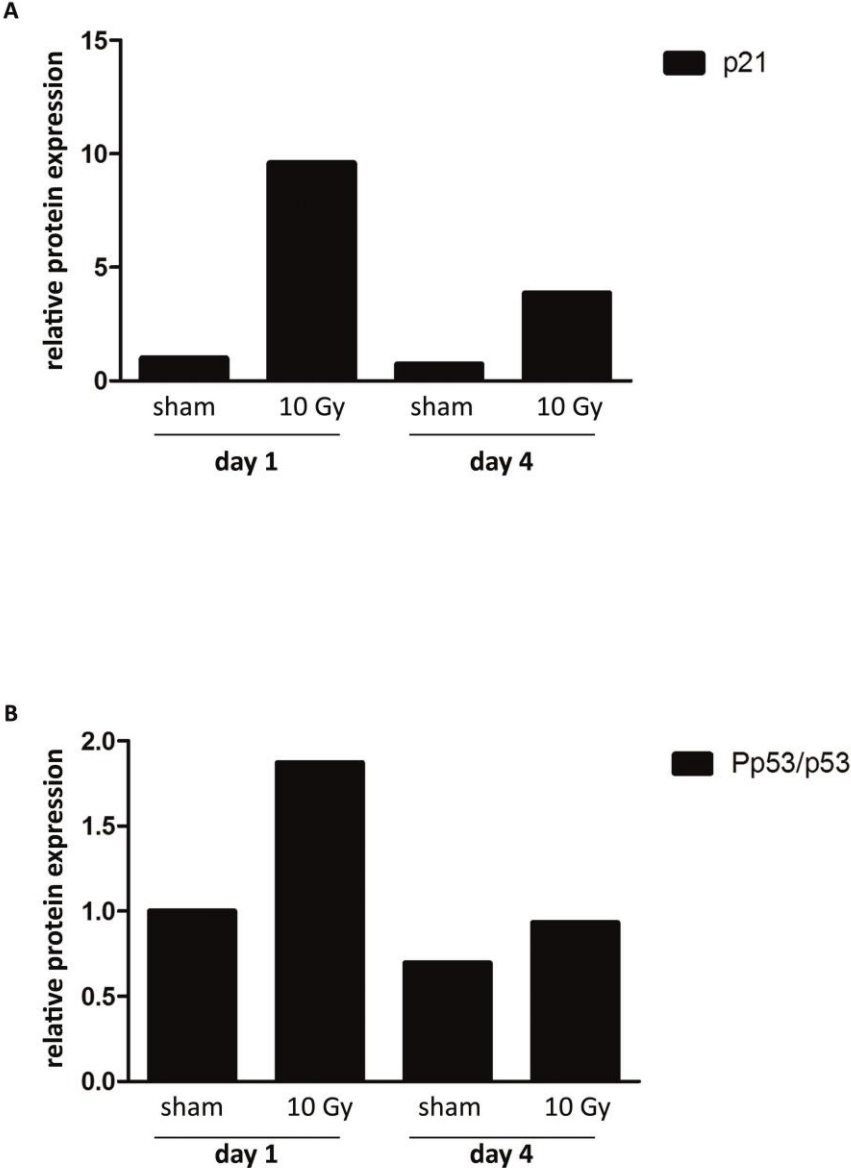

## *Supplementary Figure S1*

### *Lung epithelial cells radiation response and senescence markers*

A. Quantification of p21 protein expression level in irradiated and non-irradiated Beas-2B lysates made 1 and 4 days after treatment. Quantification normalized according the tubulin protein expression level. Protein levels relative to control, Beas-2B sham day 1.

B. Quantification of Pp53 and p53 protein expression level in irradiated and non-irradiated Beas-2B of lysates made 1 and 4 days after treatment. The ratio Pp53/p53 is shown in the graph. Quantification is normalized according the GAPDH protein expression level. Protein levels relative to control, Beas-2B sham day 1.

Supplementary Fig. S2

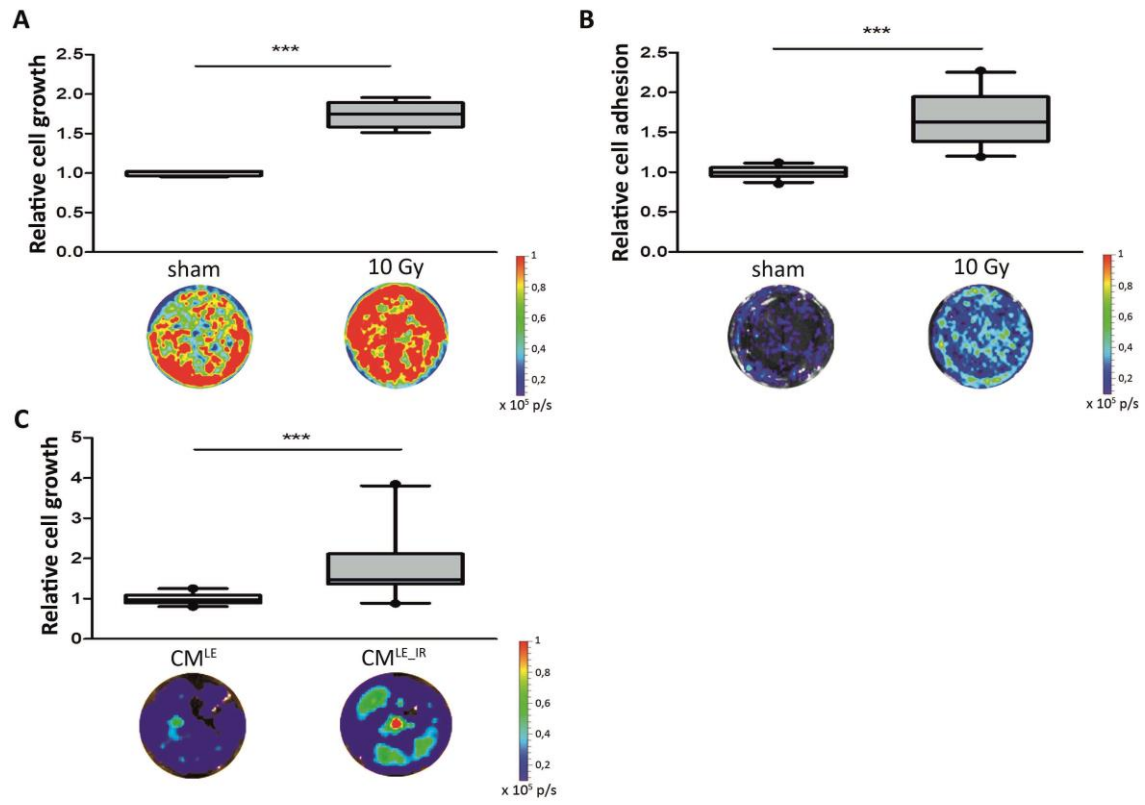

*Supplementary Figure S2*

*Impact of irradiated lung epithelial cells on 4T1\_luc breast cancer cell adhesion and growth*

- A. Box plots illustrating the relative cell growth of 4T1\_luc cells . Co-culture of breast cancer cells with irradiated Beas-2B cells increases relative cell growth compared to co-culture with sham treated Beas-2B cells. Quantification by bioluminescent imaging after 4 days of incubation. Data is represented as relative fold change compared with the corresponding control value. 4T1\_luc:  $n=6$ ; \*\*\*,  $P<0.001$  (Unpaired t-test with Welch's correction).
- B. Box plots illustrating the relative cell adhesion of 4T1\_luc cells. Relative adhesion of breast cancer cells to irradiated Beas-2B cell monolayer is increased compared to sham treated Beas-2B cell monolayer. Quantification by bioluminescent imaging after 24 hours incubation. Data is represented as relative fold change compared with the corresponding control value. 4T1\_luc:  $n=10$ ; \*\*\*,  $P<0.001$ . (Unpaired t-test with Welch's correction).

*Impact of  $CM^{LE-IR}$  on breast cancer cell morphology, growth, migration and extravasation*

- C. Box plots illustrating the relative cell growth of 4T1\_luc cells. Treatment of breast cancer with  $CM^{LE-IR}$  increases relative cell growth compared to cells treated with  $CM^{LE}$ . Quantification by bioluminescent imaging after 4 days incubation. Data is represented as relative fold change compared with the corresponding control value ( $CM^{LE}$ ). 4T1\_luc:  $n=18$ ; \*\*\*,  $P<0.001$  (Mann-Whitney U).

Supplementary Fig. S3

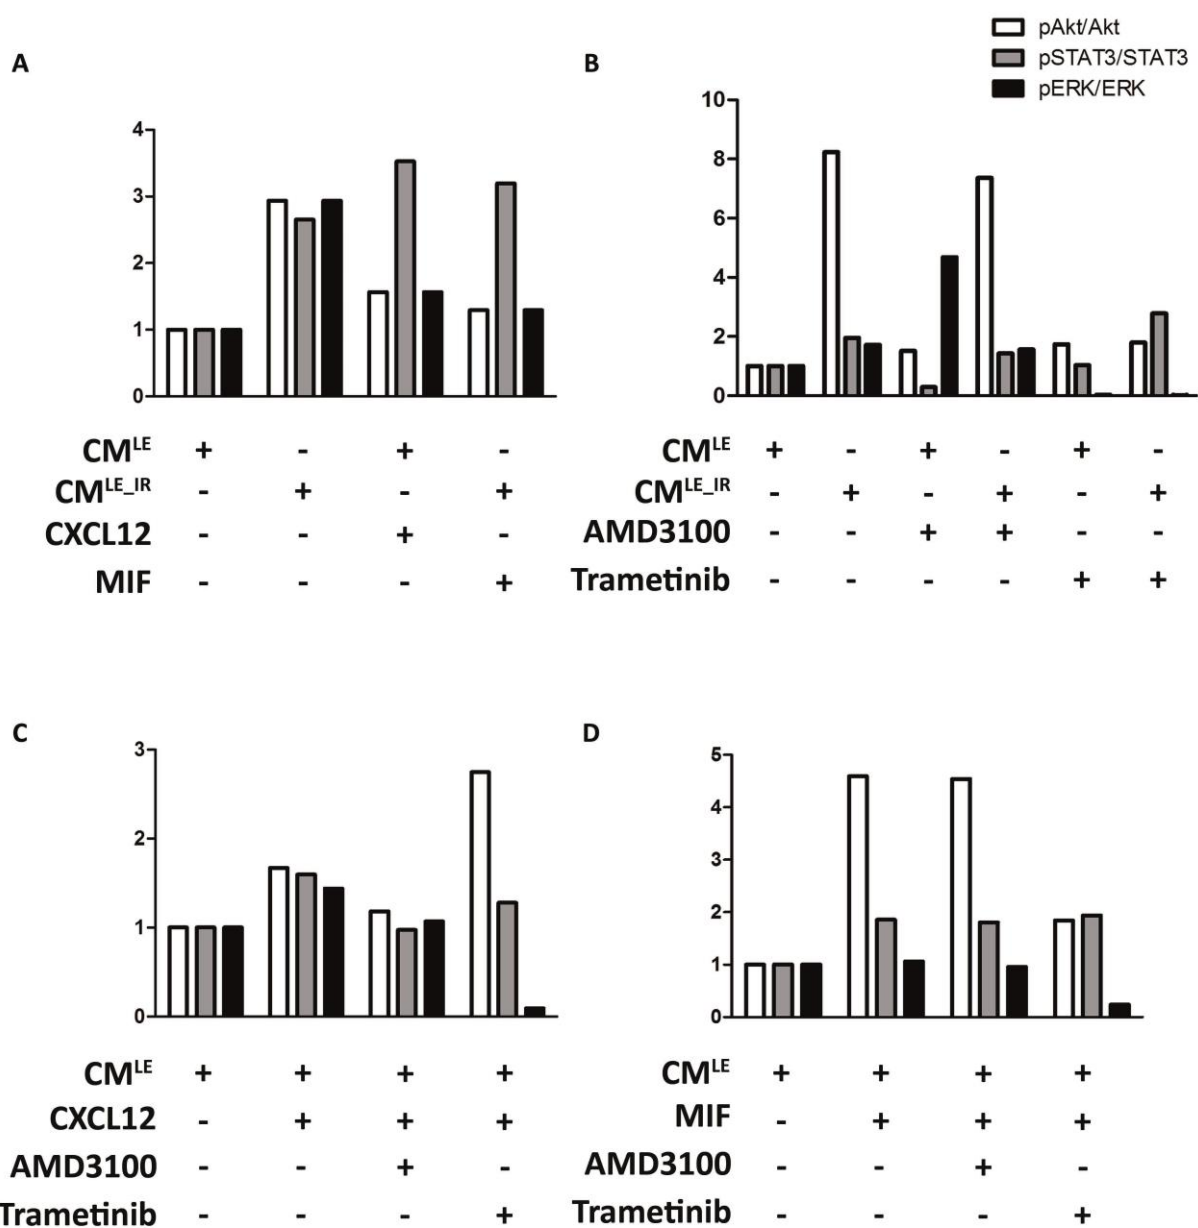

*Supplementary Figure S4*

*Quantification pAkt/Akt, pSTAT3/STAT3 and pERK/ERK*

Western blot analysis of the ratio pAkt/Akt, pSTAT3/STAT3 and pERK/ERK protein expression after tubulin normalization. Protein levels relative to control MDA-MB-231GFP\_luc cells exposed to CM<sup>LE</sup>. For Western blot visualisation see Figure 6.

Supplementary Fig. S4

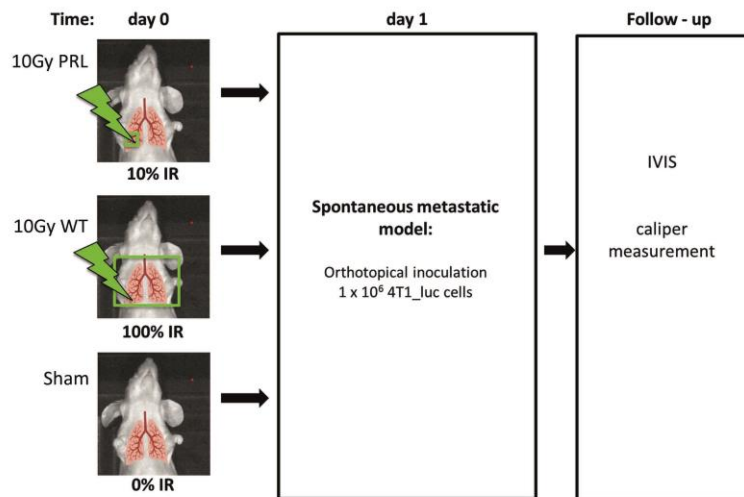

Supplementary Figure S4

*In vivo experiment set-up*

Supplementary Fig. S5

A

PRL

I. Set isocenter

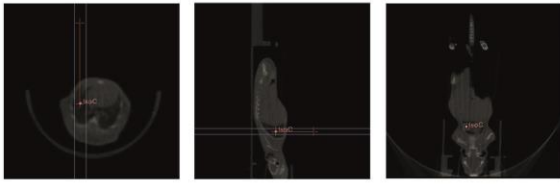

II. Segmentation

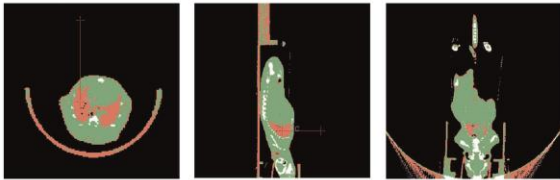

III. Dose distribution

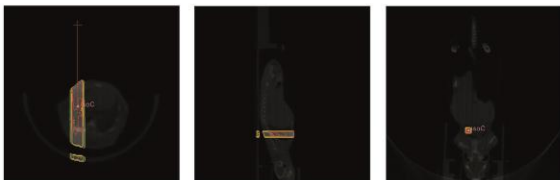

B

WT

I. Set isocenter

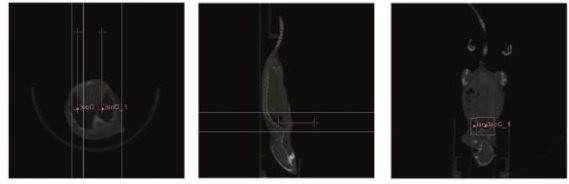

II. Segmentation

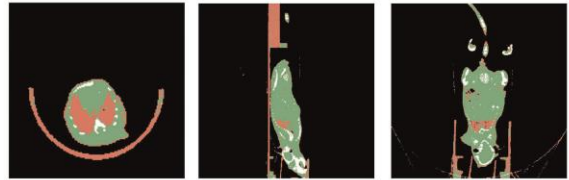

III. Dose distribution

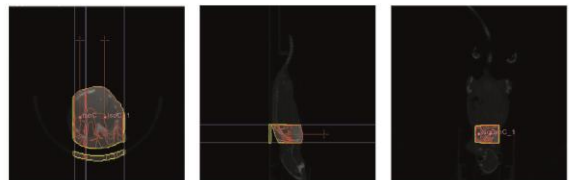

C

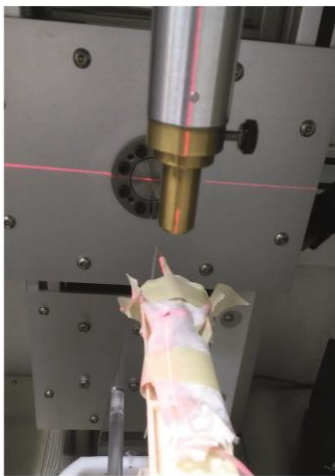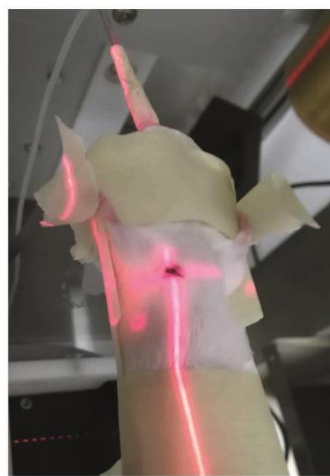



*Supplementary Figure S5*

*SARRP protocol*

- A. SARRP protocol partial right lung irradiation. Accurate irradiation of the mouse was achieved by making an image of the lung by cone beam CT. Treatment isocenter was indicated on CT. Next, we mark the different kinds of tissue (segmentation) and the SARRP software calculates the mouse-specific dose.
- B. SARRP protocol whole thorax irradiation. Accurate irradiation of the mouse was achieved by making an image of the lung by cone beam CT. Treatment isocenters were indicated on CT. Next, we mark the different kinds of tissue (segmentation) and the SARRP software calculates the mouse-specific dose.
- C. Visualization isocenter partial lung irradiation. Mice were anesthetized, fixed on a plastic bed and placed on a holder secured onto the robotic positioning table. Laser beam indicates treatment isocenter.

Supplementary Fig. S6

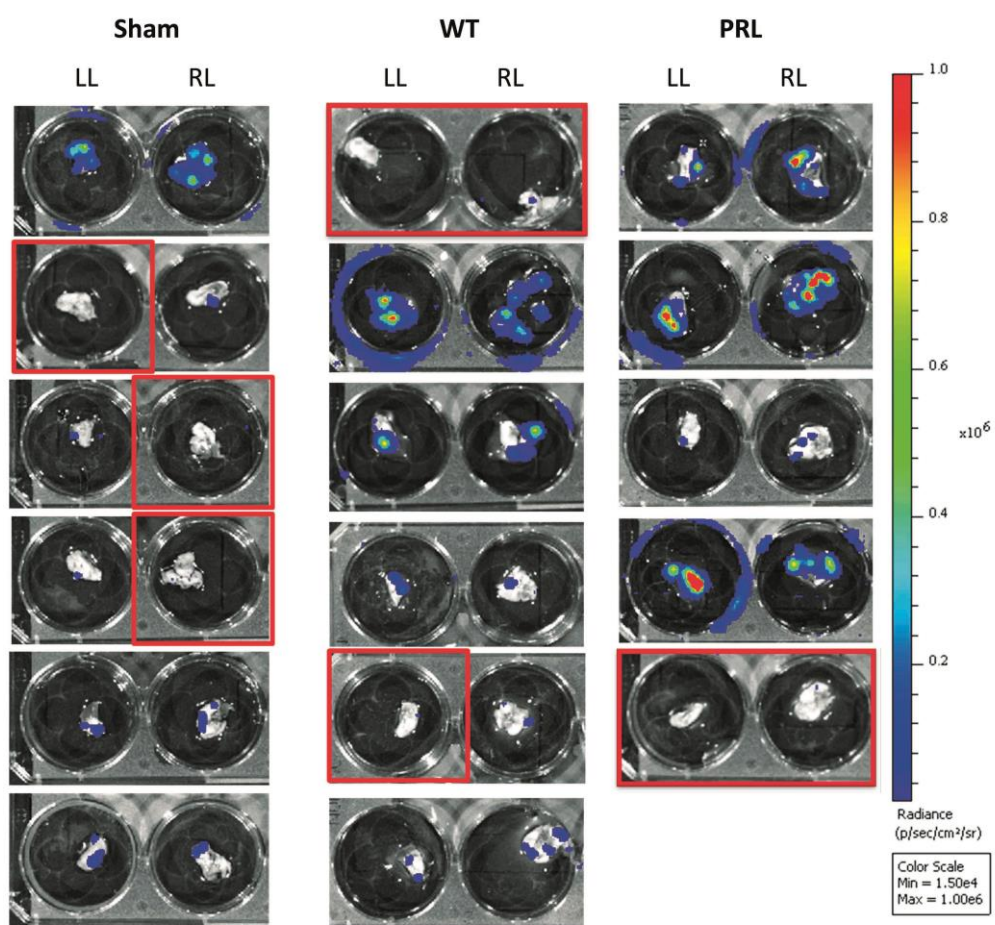

*Supplementary Figure S6*

*Ex vivo set-up.* Red square indicating no metastasis formation in the lung.

Supplementary Fig. S7

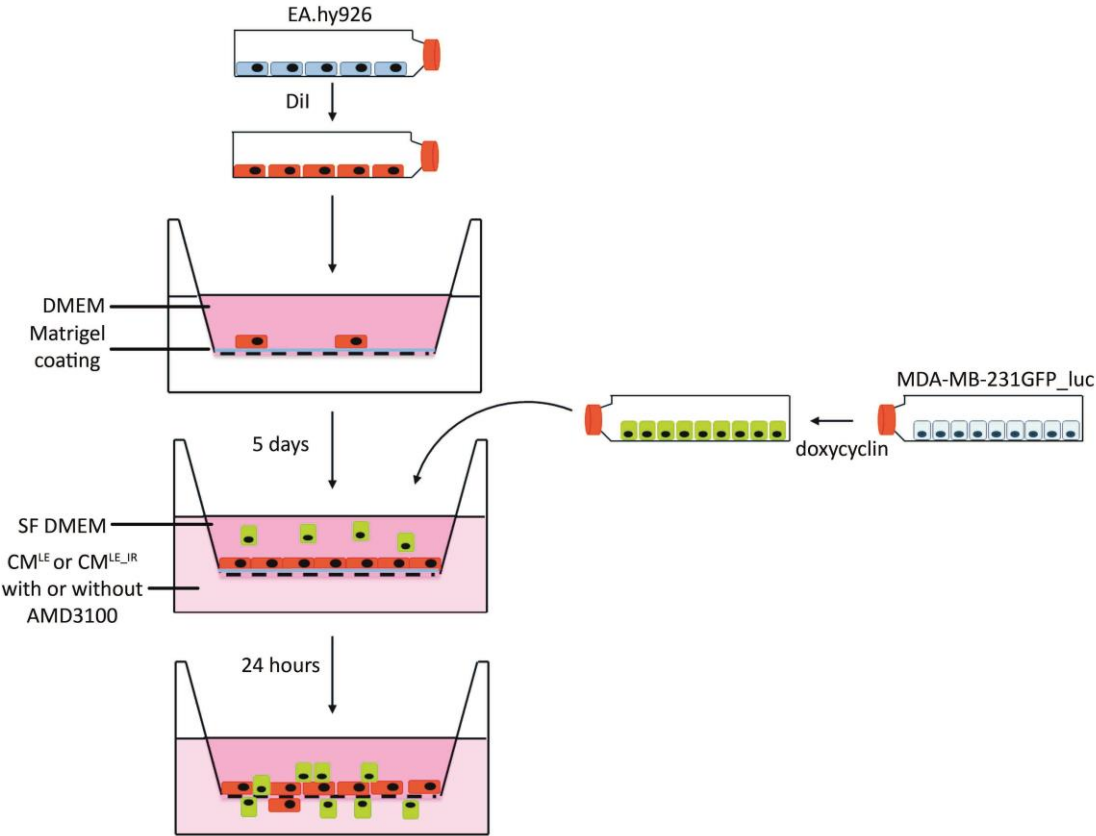

*Supplementary Figure S7*

*In vitro functional assay: Transendothelial migration*

## Supplementary Materials and Methods

### ***Antibodies and reagents***

The following primary antibodies were used for Western blot analysis, IHC and ICC: rabbit polyclonal anti-Akt (9272, 1:1000), rabbit polyclonal anti-ERK1/2 (p44/42 MAPK, 9102, 1:1000), rabbit monoclonal anti-phospho-Akt (Ser473, 4058, 1:1000), rabbit polyclonal anti-phospho-ERK1/2 (p44/42 MAPK; Thr202/Tyr204, 9101, 1:1000), rabbit polyclonal anti-phospho-p53 (Ser15, 9284, 1:500), rabbit polyclonal anti-phospho-Stat3 (Tyr705, 9131, 1:1000), rabbit polyclonal anti-stat3 (9132; 1:1000) (Cell Signalling Technology, Danvers, MA, USA), rabbit polyclonal anti-CXCR4 (NB100-56437, 1:500) (Novus Biologicals, Cambridge, UK), rabbit polyclonal anti-p21 (H-164, sc-756, 1:500), mouse monoclonal anti-p53 (DO-1, sc-126, 1:1000) (Santa Cruz Biotechnology, Santa Cruz, CA, USA), mouse monoclonal anti- $\alpha$ -tubulin (T5168, 1:5000), mouse monoclonal anti-GAPDH (G8795, 1:5000) (Sigma-Aldrich, St. Louis, MO, USA) mouse monoclonal anti- $\gamma$ H2AX (613402, 1:500) (Biolegend, Sant Diego, CA, USA) rabbit polyclonal anti- $\gamma$ H2AX (00059, 1:3000) (Bethyl Laboratories, Montgomery, TX, USA) . Secondary antibodies coupled to horseradish peroxidase, Alexa-488 or Alexa-594 were obtained from Amersham Pharmacia Biotech (Diegem, Belgium) or Sigma-Aldrich. Nuclear staining DAPI stain, DAB (D5637) and F-actin stain phalloidin-Alexa Fluor 594 were from Sigma-Aldrich. Following reagents were used: AMD3100 octahydrochloride (3299) (Tocris Bioscience, Bristol, UK), Trametinib (S2673) (Selleckchem, Houston, TX, USA), recombinant MIF (289-MF-0002), recombinant CXCL12 (350-NS-010) (R&D Systems, Minneapolis, MN, USA), D-luciferin, Firefly, potassium salt (122796) (PerkinElmer, Waltham, MA, USA), Zeocine (E6110) (Promega, Madison, WI, USA) Doxycycline, FITC-Dextran (46945) (Sigma-Aldrich), Vybrant<sup>®</sup>DiI cell-labelling solution (V-22885) (Molecular Probes, Waltham, MMA, USA). In the *in vitro* experiments, AMD3100 was used at 10  $\mu$ M, Trametinib at 50 nM,

recombinant CXCL12 and MIF at 50 ng/mL, D-luciferin at 150 µg/mL, Zeocine at 500 µg/mL, Doxycycline at 500 ng/mL, FITC-Dextran at 1 mg/mL and Vybrant®Dil 5µL/mL/10<sup>6</sup> cells. *In vivo* D-luciferin was used at 150 mg/kg mice and *ex vivo* at 300 µg/mL.

### ***Viability Assay***

Beas\_2B cells were seeded in a 24-well plate. Plates were treated either with 10 Gy or 0 Gy. After 4 days cells were rinsed 3 times with PBS<sup>D+</sup> and 200 µL of LIVE/DEAD mixture was added to the cells for 30 minutes at 37°C in 5% CO<sub>2</sub>. Mixture contained 5 µM calcein-AM (living cells, green fluorescent 496/517nm) and 20 µM ethidium homodimer-1 (dead cells, red fluorescent 528/617 nm). Cells were washed with PBS<sup>D+</sup> and analysed by fluorescence microscopy (Zeiss 510 META confocal laser scanning microscope, Carl Zeiss, Micro-imaging, Heidelberg, Germany).

### ***Conditioned medium of irradiated and unirradiated bronchial epithelial cells***

Three days after treatment, cells were washed, three times, and put on serum-free MEM culture medium with 100 U/mL penicillin, 100 µg/mL streptomycin, 2,5 µg/mL fungizone and put in an incubator at 37°C and 5% CO<sub>2</sub>. After 24 hours the medium of both groups was harvested separately and centrifuged for 5 minutes at 1000 rpm on 4°C. The supernatants were collected and filtered through a 0.2 µM Whatmann filter. All conditioned media were normalized to an equal number of 6,25 x 10<sup>5</sup> cells. Both conditioned media were stored at -20°C until further use for experiments.

### ***Protein analysis***

*Lysate preparation, SDS\_PAGE and Western blot analysis*

Lysates were made of 70% confluent cell cultures by PBS containing 1% Triton X-100, 1% NP-40 (Sigma), and the Halt® Protease and Phosphatase inhibitor cocktail (1:100, Thermo Scientific). After sonication and centrifugation of lysate (14000 rpm for 10 minutes at 4°C), supernatant was used for measuring protein concentration by using RC DC protein assay kit (Bio-Rad Laboratories S.A.-N.V.). Samples were prepared with an equal amount of protein in Laemmli sample buffer with 5% β-mercaptoethanol and 0.005% bromophenol blue. Next, samples were boiled for 5 minutes at 95°C. Finally, proteins were separated by electrophoresis. Proteins from the gel were blotted onto a nitrocellulose membrane and blocked in 5% nonfat milk in PBS<sup>D-</sup> or 4% BSA in PBS<sup>D-</sup> for phosphorylated proteins, both supplemented with 0,5% Tween-20 and immunostained. Next, a chemiluminescent substrate for horseradish peroxidase (ECL western blotting detection reagent; GE Healthcare, Belgium) was added and signal was measured and visualized by ProXima 2850 (Isogen Lifescience, De Meern, Netherlands). Quantification was done by ImageJ software.

#### *Cytokine array.*

Assay for cytokine antibody arrays was performed as per manufacturer's instructions. Briefly, cytokine array membranes were blocked with 5% BSA/TBS (0.01 M Tris HCl pH 7.6/0.15 M NaCl) for 1 hour. Membranes were then incubated with about 2 ml of CM<sup>LE</sup> or CM<sup>LE-IR</sup> after normalization with equal amounts of protein. After washing 3 times with PBS<sup>D-</sup> supplemented with 0.1% Tween 20, the membranes were then incubated with a cocktail of biotin-labelled antibodies against different individual cytokines. The membranes were then washed and incubated with HRP-conjugated streptavidin (2,5 pg/ml) for 1 hour at room temperature. After 2 times washing with PBS<sup>D-</sup> supplemented with 0.1% Tween 20, the



signals were detected by ProXima 2850. Densitometric values of spots were quantified using ImageJ Software (Scion Corp., Frederick, MD, USA).

### ***Functional assays with conditioned media***

#### *Transendothelial migration assay*

Endothelial monolayer formation and quantification. EA.hy926 endothelial cells were transiently red-fluorescently labeled with Vybrant® Dil cell-labelling solution according to the manufacturer's protocol. Endothelial cells were seeded in the upper compartment of a Matrigel (100 µg/mL) coated 8 µm pore size Transwell culture system and cultured in normal cell conditions at 37°C in 5% CO<sub>2</sub> for 5 days until a monolayer was formed. Monolayer permeability was tested by fluorescent measuring of 70 kDa FITC-dextran flux across the endothelial cell monolayer. Briefly, the endothelial monolayer was washed 2 times with PBS<sup>D+</sup> followed by addition of 150 µL of FITC-Dextran (1 mg/mL) to the upper chamber and 700 µL PBS<sup>D+</sup> in the lower chamber. After 1 hour incubation at 37°C in 5% CO<sub>2</sub>, FITC-Dextran concentration from each lower chamber was calculated using a fluorescent multi-well plate reader with excitation and emission wavelength of 485 nm and 530 nm, respectively (SpectraMax® Paradigm® Multi-Mode Microplate Detection Platform reader, Molecular Devices, Sunnyvale, California, USA). When no fluorescent intensity was detected, EA.hy926 reached confluency.

Supplementary Table 1

| array number | cytokine              | CM <sup>LE</sup>    |               |                 |                     | CM <sup>LE_IR</sup> |                 |                  |                     |
|--------------|-----------------------|---------------------|---------------|-----------------|---------------------|---------------------|-----------------|------------------|---------------------|
|              |                       | cytokine expression |               | mean expression | relative expression | cytokine expression |                 | mean expression  | relative expression |
| 470          | TGF-beta 5            | 8513.368            | 8832.832      | 8673.1          | 1                   | 8202.468            | 8244.489        | 8223.4785        | 0.948159078         |
| 40           | BIK                   | 6092.974            | 5131.104      | 5612.039        | 1                   | 4995.983            | 6219.761        | 5607.872         | 0.999257489         |
| 249          | IL_1 sRII             | 7862.589            | 7671.711      | 7767.15         | 1                   | 7864.276            | 7685.953        | 7775.1145        | 1.001025408         |
| 438          | S100A10               | 7717.418            | 8304.125      | 8010.7715       | 1                   | 8503.296            | 7887.347        | 8195.3215        | 1.023037731         |
| 216          | ICAM-2                | 6980.681            | 7628.196      | 7304.4385       | 1                   | 6694.811            | 8961.761        | 7828.286         | 1.071716327         |
| 336          | LECT2                 | 3083.841            | 3723.196      | 3403.5185       | 1                   | 3874.054            | 3677.983        | 3776.0185        | 1.109445563         |
| 78           | Csk                   | 4489.619            | 4410.933      | 4450.276        | 1                   | 6515.74             | 6732.983        | 6624.3615        | 1.48852824          |
| 206          | HCR / CRAM-A/B        | 873.477             | 789.184       | 831.3305        | 1                   | 1598.912            | 1601.175        | 1600.0435        | 1.924677971         |
| 120          | Endostatin            | 3074.69             | 3347.004      | 3210.847        | 1                   | 7548.61             | 6923.945        | 7236.2775        | 2.253697389         |
| 430          | P-selectin            | 7919.246            | 7966.61       | 7942.928        | 1                   | 20156.73            | 20934.73        | 20545.731        | 2.586669676         |
| 199          | GREMLIN               | 566.113             | 586.749       | 576.431         | 1                   | 2081.841            | 1301.276        | 1691.5585        | 2.934537698         |
| 335          | LBP                   | 2341.255            | 2459.861      | 2400.558        | 1                   | 9519.64             | 9708.711        | 9614.1755        | 4.004975302         |
| 357          | M-CSF                 | 546.87              | 677.456       | 612.163         | 1                   | 3443.012            | 4220.205        | 3831.6085        | 6.259131146         |
| 370          | MMP-1                 | 1301.527            | 271.728       | 786.6275        | 1                   | 6794.054            | 4673.397        | 5733.7255        | 7.288997016         |
| 194          | Glypican 3            | 1001.234            | 1021.234      | 1011.234        | 1                   | 6704.882            | 10301.37        | 8503.125         | 8.40866209          |
| 200          | GRO                   | 284.678             | 120.142       | 202.41          | 1                   | 2064.477            | 1606.551        | 1835.514         | 9.068297021         |
| 367          | MIP 2                 | 374.263             | 252.556       | 313.4095        | 1                   | 2876.184            | 3550.184        | 3213.184         | 10.25235036         |
| 488          | TIMP-3                | 468.678             | 350.678       | 409.678         | 1                   | 4119.154            | 5167.497        | 4643.3255        | 11.33408555         |
| 353          | MCP-1                 | 201.849             | 303.142       | 252.4955        | 1                   | 2530.113            | 3555.962        | 3043.0375        | 12.05184845         |
| 471          | TGF-beta RI/ ALK-5    | 624.163             | 988.77        | 806.4665        | 1                   | 9708.953            | 9837.146        | 9773.0495        | 12.11835768         |
| 346          | LRP-6                 | 390.142             | 384.406       | 387.274         | 1                   | 5943.803            | 4609.054        | 5276.4285        | 13.62453586         |
| 229          | IGFBP-rp1/IGFBP-7     | 1221.426            | 1383.841      | 1302.6335       | 1                   | 20889.75            | 18105.68        | 19497.7165       | 14.96792191         |
| 373          | MMP-7                 | 266.385             | 120.192       | 193.2885        | 1                   | 2923.012            | 2974.74         | 2948.876         | 15.25634479         |
| 527          | VEGF                  | 194.556             | 152.071       | 173.3135        | 1                   | 2569.326            | 2745.962        | 2657.644         | 15.33431614         |
| 487          | TIMP-2                | 660.941             | 350.213       | 505.577         | 1                   | 7919.468            | 7820.175        | 7869.8215        | 15.56601962         |
| 186          | GRF alpha-4           | 358.678             | 349.263       | 353.9705        | 1                   | 5975.811            | 5543.083        | 5759.447         | 16.27098021         |
| 176          | GDF3                  | 109.263             | 108.021       | 108.642         | 1                   | 1799.69             | 2279.154        | 2039.422         | 18.77194823         |
| 260          | IL-6                  | 286.556             | 238.728       | 262.642         | 1                   | 4280.581            | 5634.569        | 4957.575         | 18.8757891          |
| 233          | IGF-II R              | 279.435             | 169.021       | 224.228         | 1                   | 4491.811            | 4607.882        | 4549.8465        | 20.29116123         |
| 60           | CCR3                  | 430.627             | 193.314       | 311.9705        | 1                   | 6979.782            | 5819.447        | 6399.6145        | 20.51352452         |
| 188          | GITR Ligand / TNFSF18 | 354.385             | 275.728       | 315.0565        | 1                   | 5459.447            | 9262.418        | 7360.9325        | 23.36384902         |
| 15           | ALCAM                 | 283.971             | 264.799       | 274.385         | 1                   | 7537.983            | 5343.083        | 6440.533         | 23.4726133          |
| 477          | Thrombospondin-1      | 699.891             | 726.77        | 713.3305        | 1                   | 16009.97            | 19078.93        | 17544.4535       | 24.59512596         |
| 181          | GDF-15                | 41.778              | 86.192        | 63.985          | 1                   | 1711.74             | 1700.527        | 1706.1335        | 26.66458545         |
| 262          | IL-7                  | 121.314             | 137.778       | 129.546         | 1                   | 4759.276            | 3448.861        | 4104.0685        | 31.68039538         |
| 278          | IL-13                 | 216.435             | 208.263       | 212.349         | 1                   | 6133.882            | 7389.518        | 6761.7           | 31.84239153         |
| 277          | IL-12R beta 2         | 192.728             | 67.657        | 130.1925        | 1                   | 4863.376            | 5012.083        | 4937.7265        | 37.92637441         |
| 208          | GLO-1                 | 96.971              | 163.607       | 130.289         | 1                   | 5684.468            | 5095.045        | 5389.7565        | 41.3677018          |
| 133          | FAM38                 | 204.142             | 171.335       | 187.7385        | 1                   | 8978.468            | 6982.033        | 7980.2505        | 42.50726676         |
| 522          | uPA                   | 107.607             | 277.092       | 192.3495        | 1                   | 9242.296            | 8372.882        | 8807.589         | 45.78950816         |
| 345          | LRP-1                 | 161.728             | 77.314        | 119.521         | 1                   | 6656.368            | 4831.276        | 5743.822         | 48.0570109          |
| 151          | FGF-16                | 81.071              | 70.607        | 75.839          | 1                   | 3615.619            | 3987.054        | 3801.3365        | 50.12376877         |
| 445          | sFRP-4                | 226.778             | 264.506       | 245.642         | 1                   | 12691               | 12164.76        | 12427.8825       | 50.59347546         |
| 372          | MMP-3                 | 167.142             | 70.071        | 118.6065        | 1                   | 6900.539            | 5825.761        | 6363.15          | 53.64925194         |
| 292          | IL-17RC               | 71.899              | 117.192       | 94.5455         | 1                   | 5902.497            | 5907.104        | 5904.8005        | 62.45459065         |
| 104          | Dkk-1                 | 167.263             | 71.778        | 119.5205        | 1                   | 6770.761            | 8387.903        | 7579.332         | 63.41449375         |
| 225          | IGFBP-2               | 125.485             | 98.485        | 111.985         | 1                   | 6617.882            | 7606.861        | 7112.3715        | 63.51182301         |
| 486          | TIMP-1                | 117.607             | 147.021       | 132.314         | 1                   | 8509.459            | 8343.782        | 8426.6205        | 63.68653733         |
| 499          | TNF RI/ TNFRSF1A      | 96.021              | 76.485        | 86.253          | 1                   | 5970.004            | 5723.468        | 5846.736         | 67.78588571         |
| 384          | MMP-20                | 123.192             | 34.485        | 78.8385         | 1                   | 5821.175            | 7018.782        | 6419.9785        | 81.43202243         |
| <b>442</b>   | <b>SDF-1/CXCL12</b>   | <b>100.485</b>      | <b>70.607</b> | <b>85.546</b>   | <b>1</b>            | <b>7977.418</b>     | <b>6373.539</b> | <b>7175.4785</b> | <b>83.87859748</b>  |
| 110          | EDA-A2                | 50.071              | 83.778        | 66.9245         | 1                   | 5664.326            | 5576.146        | 5620.236         | 83.97875218         |
| <b>362</b>   | <b>MIF</b>            | <b>145.607</b>      | <b>84.192</b> | <b>114.8995</b> | <b>1</b>            | <b>10053.27</b>     | <b>9814.853</b> | <b>9934.06</b>   | <b>86.45868781</b>  |
| 293          | IL-17RD               | 81.314              | 82.778        | 82.046          | 1                   | 9926.782            | 7834.418        | 8880.6           | 108.2392804         |
| 282          | IL-15R alpha          | 74.899              | 82.778        | 78.8385         | 1                   | 9325.246            | 7908.66         | 8616.953         | 109.2987944         |
| 264          | IL-8                  | 57.364              | 58.192        | 57.778          | 1                   | 7876.447            | 7077.589        | 7477.018         | 129.4094292         |
| 173          | GCSF                  | 75.192              | 66.485        | 70.8385         | 1                   | 9783.095            | 10946.51        | 10364.8025       | 146.3159511         |
| 228          | IGFBP-6               | 39.364              | 70.364        | 54.864          | 1                   | 9958.062            | 9769.184        | 9863.623         | 179.7831547         |
| 169          | Galectin-3            | 33.364              | 68.071        | 50.7175         | 1                   | 9885.095            | 11372.56        | 10628.8275       | 209.5692315         |

|                           |
|---------------------------|
| equal expression          |
| 1-25 fold overexpression  |
| 26-50 fold overexpression |
| > 50 fold overexpression  |

**Table 1** Cytokine expression levels. ImageJ quantification of cytokine array. CM<sup>LE</sup> values were used as control and compared with CM<sup>LE\_IR</sup>.
